# Supplementary material
Source: publisher figshare collection journal article supplement (https://acs.figshare.com/ndownloader/files/8658217)
Supplement: Supplementary file 1 [file 8658217]

## Supporting Information

# Hierarchical Porous Carbon Doped with Iron/Nitrogen/Sulfur for Efficient Oxygen Reduction Reaction

*Issa Kone,<sup>†</sup> & Ao Xie,<sup>†</sup> & Yang Tang,<sup>\*‡</sup> Yu Chen,<sup>†</sup> Jia Liu,<sup>‡</sup> Yongmei Chen,<sup>‡</sup> Yanzhi Sun,<sup>†</sup>  
Xiaojin Yang,<sup>‡</sup> Pingyu Wan<sup>\*†</sup>*

<sup>†</sup> National Fundamental Research Laboratory of New Hazardous Chemicals Assessment &  
Accident Analysis, Beijing University of Chemical Technology, 100029 Beijing, PR China

<sup>‡</sup> Institute of Applied Electrochemistry, Beijing University of Chemical Technology,  
100029 Beijing, PR China

*E-mail addresses: [tangyang@mail.buct.edu.cn](mailto:tangyang@mail.buct.edu.cn) (Y. Tang), [pywan@mail.buct.edu.cn](mailto:pywan@mail.buct.edu.cn) (P.  
Wan).*

## 1. Experimental Section

The number of electrons transferred ( $n$ ) during the ORR was calculated based on Koutecky-Levich (K-L) equations as follows:<sup>1</sup>

$$J^{-1} = J_L^{-1} + J_K^{-1} = (B\omega^{1/2})^{-1} + J_K^{-1} \quad (1)$$

$$B = 0.62nFC_0D^{2/3}\nu^{-1/6} \quad (2)$$

Where  $J$  is the current density obtained from the experiment,  $J_L$  and  $J_K$  are the diffusion-limiting current density and kinetic current density,  $\omega$  is the angular velocity of the RDE,  $F$  is Faraday constant (96485 C mol<sup>-1</sup>),  $C_0$  is the bulk concentration of O<sub>2</sub> in 0.1 M KOH (1.2×10<sup>-3</sup> mol L<sup>-1</sup>),  $D$  is the diffusion coefficient of O<sub>2</sub> in 0.1 M KOH (1.9×10<sup>-5</sup> cm<sup>2</sup> s<sup>-1</sup>),  $\nu$  is the viscosity of the electrolyte (0.01 cm<sup>2</sup> s<sup>-1</sup>).<sup>2</sup>

The following equations were used to calculate the hydrogen peroxide yields and the number of electrons transferred ( $n$ )<sup>3</sup>:

$$H_2O_2(\%) = 200 \frac{I_r/N}{I_r/N + I_d} \quad (3)$$

$$n = 4 \frac{I_d}{I_r/N + I_d} \quad (4)$$

Where  $N$  is current collection efficiency of the Pt ring (0.37),  $I_d$  is the disk current, and  $I_r$  is the ring current.

## 2. Figures and Tables

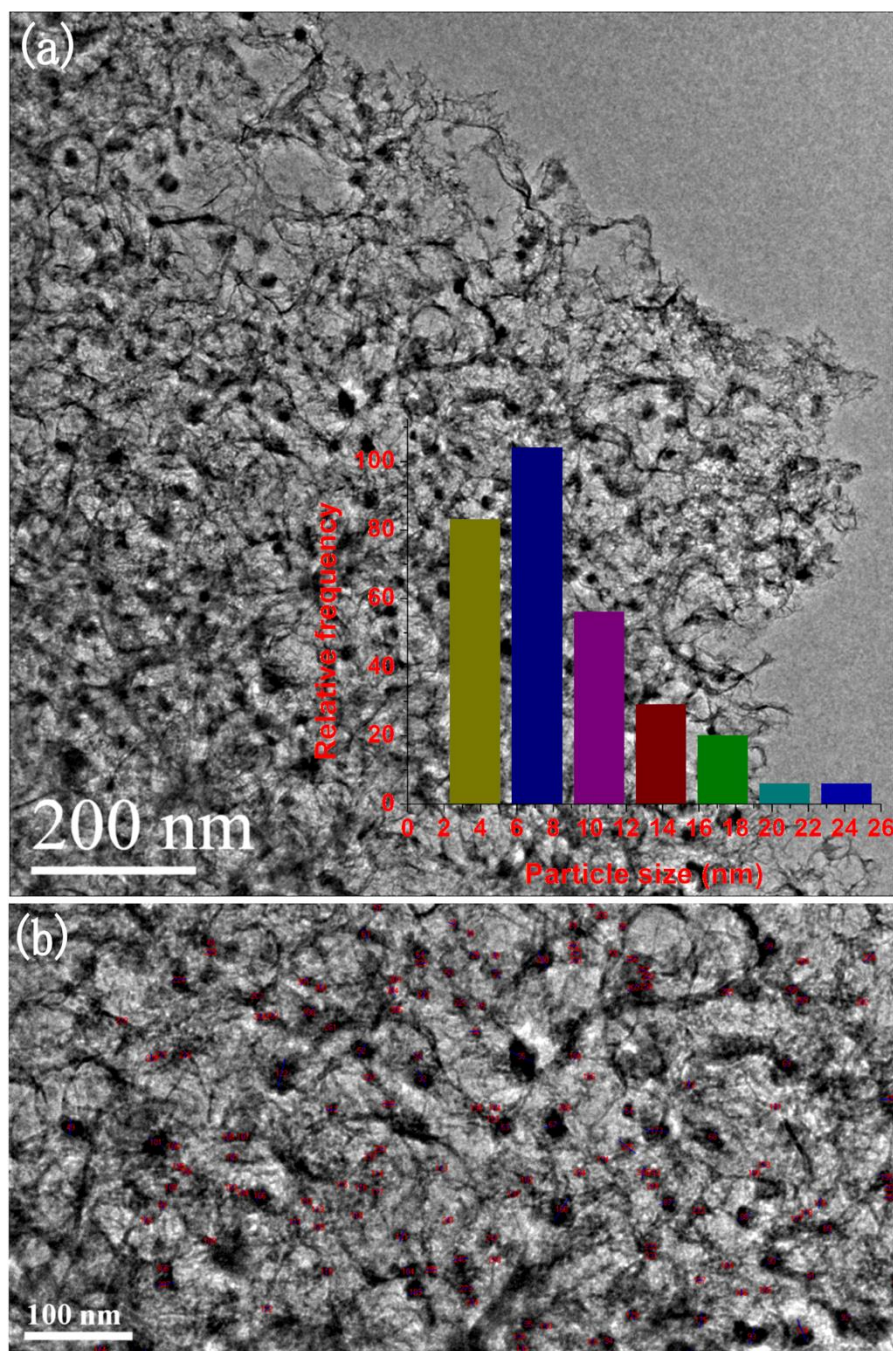

**Figure S1.** (a) TEM image and particle sizes distribution histogram on FeNS/PC; (b) TEM magnified image during sizes measurement. The particles size distribution histogram was performed by measuring 305 iron nanoparticles.

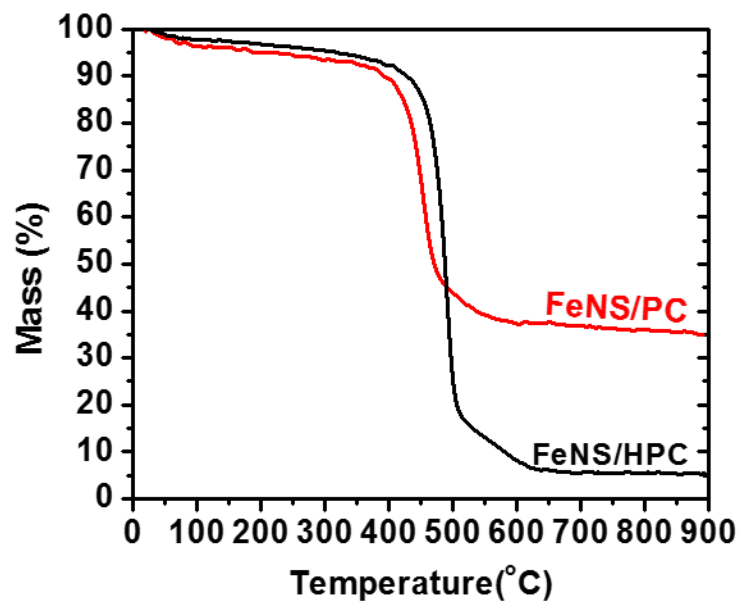

**Figure S2.** TGA curves of FeNS/PC and FeNS/HPC.

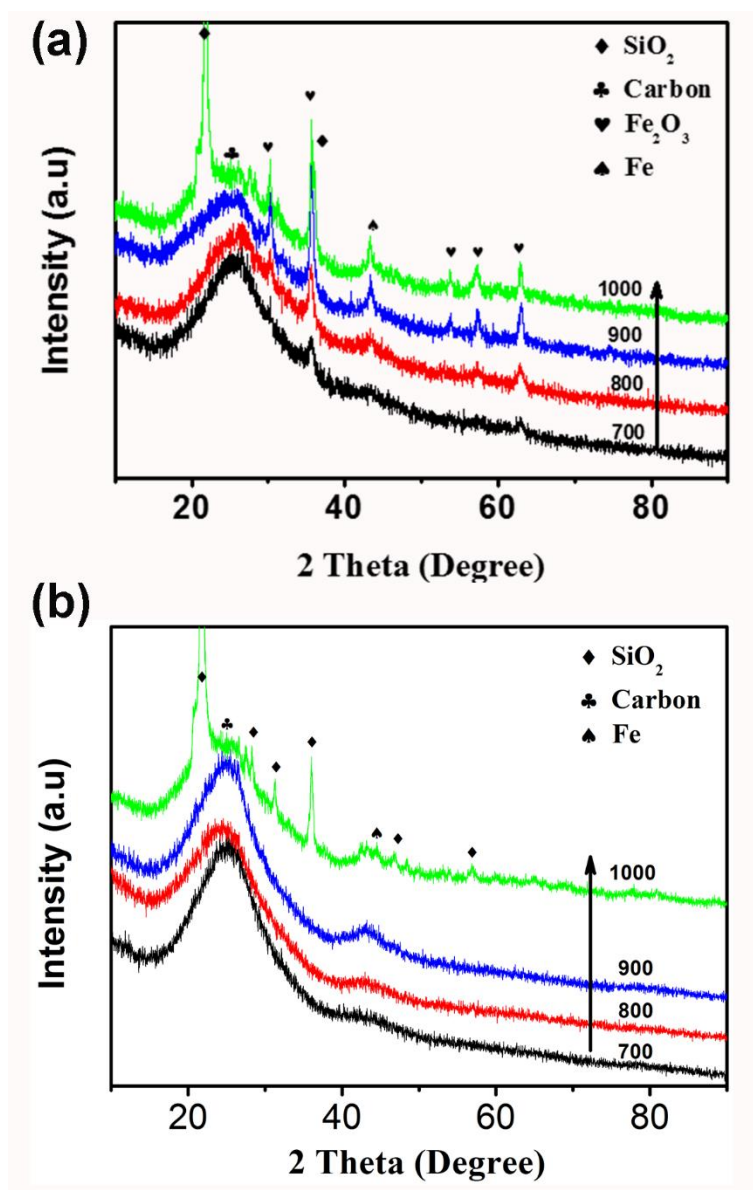

**Figure S3.** XRD patterns of FeNS/PC-x00 before acid leaching (a) and FeNS/HPC-x00, (x00=700, 800, 900 and 1000) after acid leaching (b).

The existence of  $\text{SiO}_2$  after NaOH washing is due to the high stability of  $\text{SiO}_2$  after high temperature at 1000 °C. The residual Fe peaks after acid leaching is attributed to the graphitic carbon encapsulated Fe nanoparticles, which are also verified in the HRTEM images in the manuscript.

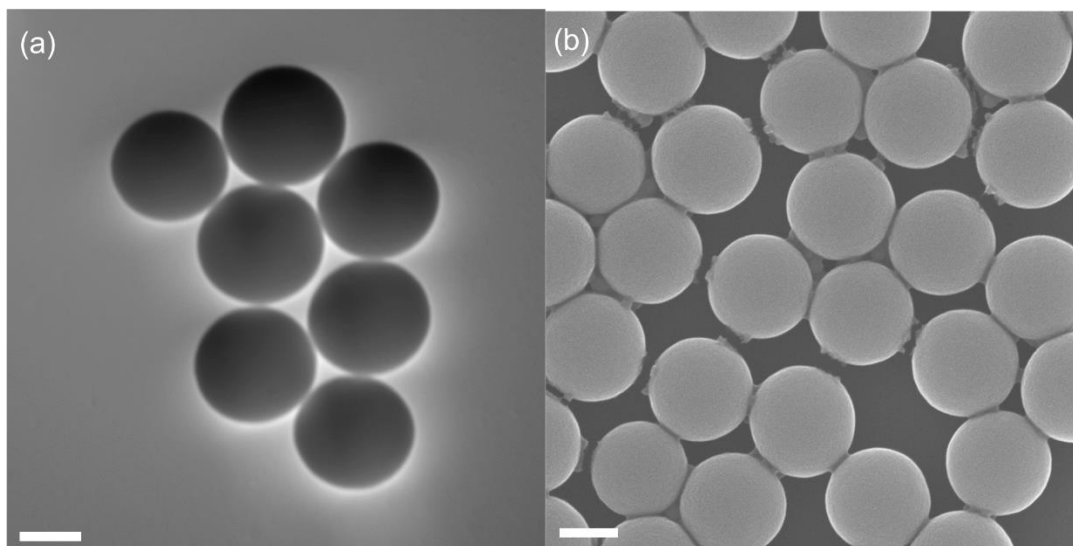

**Figure S4.** (a) TEM and (b) SEM images of the employed silica. The length of scale bar is 50 nm.

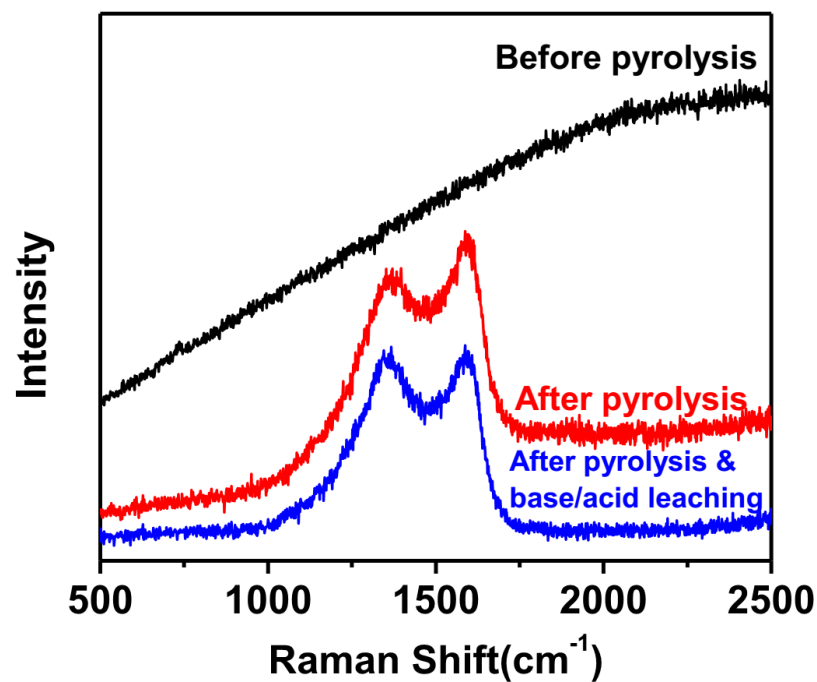

**Figure S5.** The Raman spectra of sample before pyrolysis, after pyrolysis and base & acid leaching.

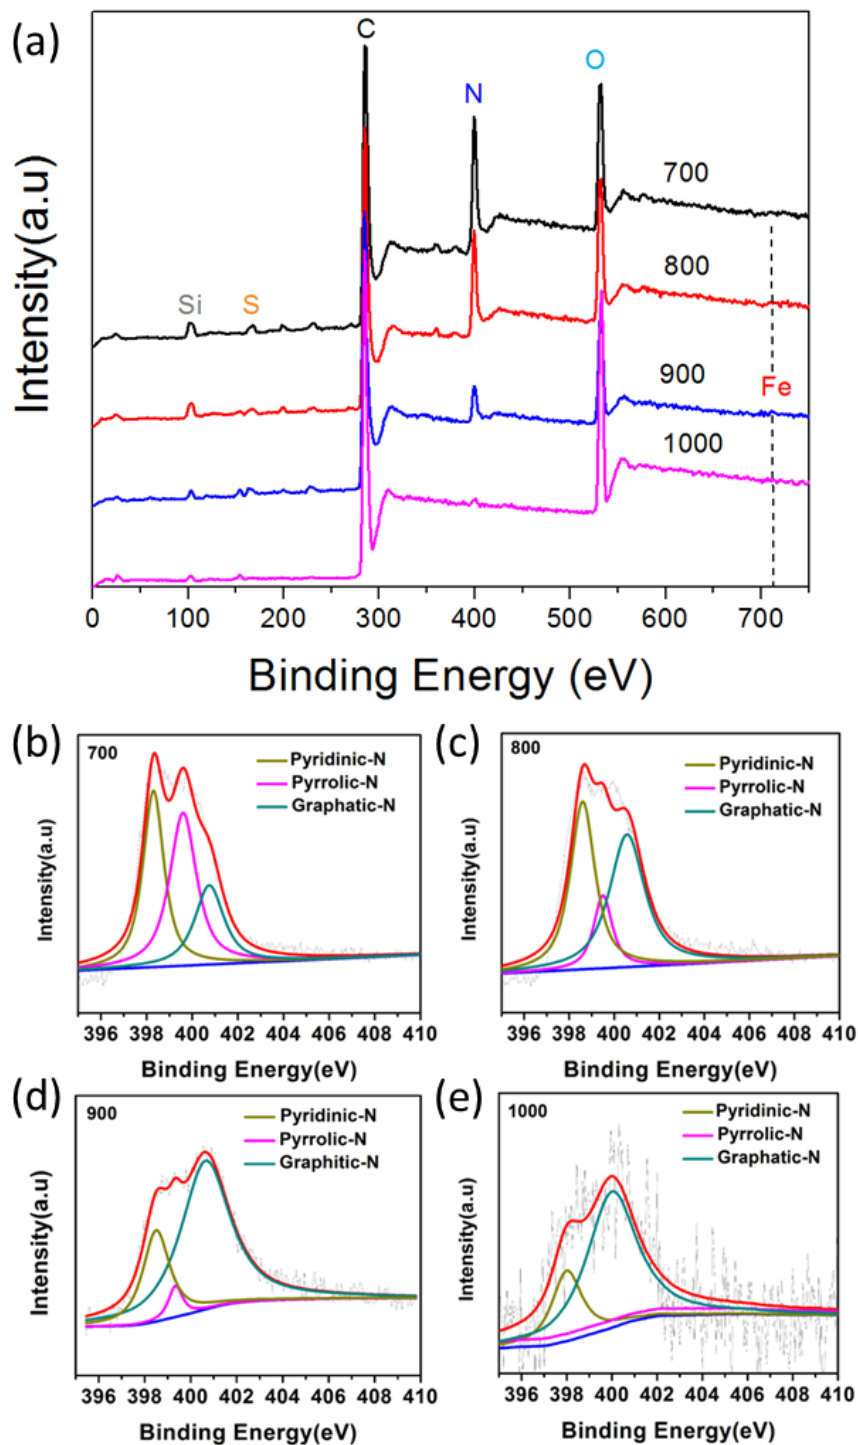

**Figure S6.** (a) XPS spectra of the samples FeNS/HPC prepared at 700, 800, 900 and 1000 °C. The corresponding high resolution N1s spectra of FeNS/HPC prepared at (b) 700°C, (c) 800°C, (d) 900°C and (e) 1000°C.



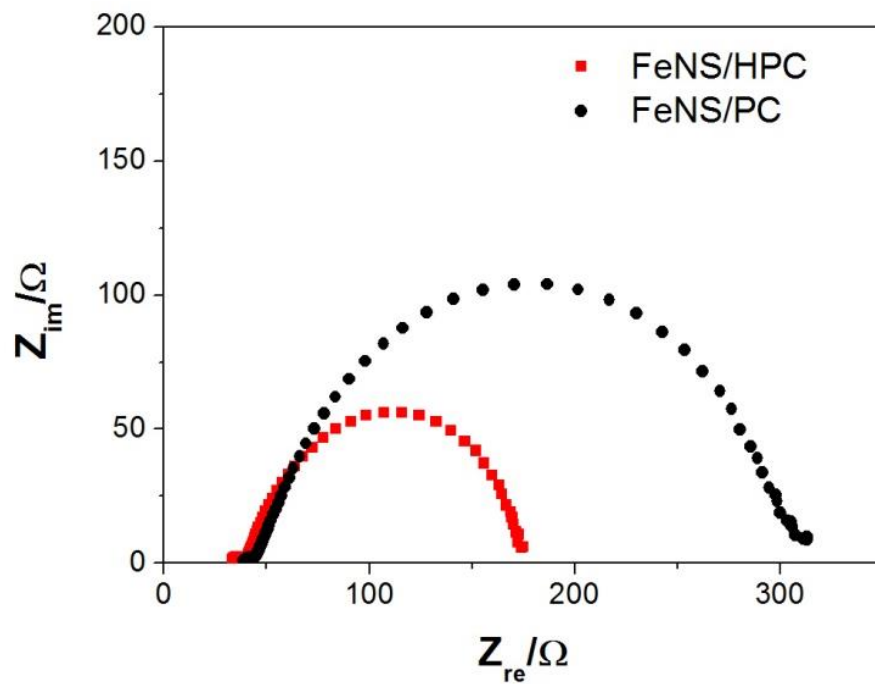

**Figure S7.** Electrochemical impedance spectra of FeNS/PC and FeNS/HPC. The EIS test was carried out at 0.86 V vs RHE with amplitude of 0.01 V from 100 KHz to 0.01Hz.

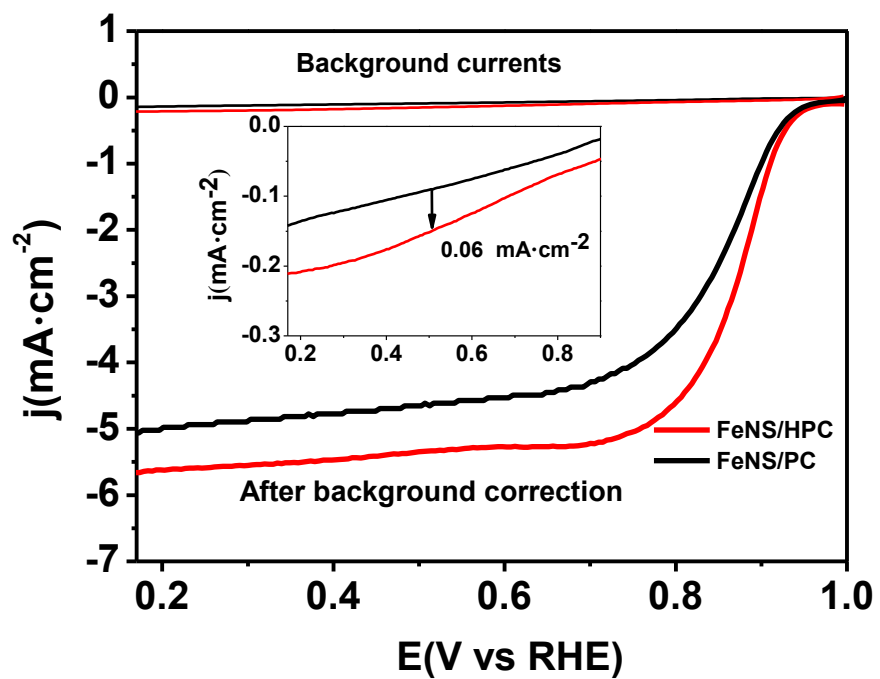

**Figure S8.** The comparison of background current and ORR current after background correction of FeNS/HPC and FeNS/PC. The background current is tested in Ar saturated 0.1 M KOH at scan rate of 5 mVs<sup>-1</sup>.

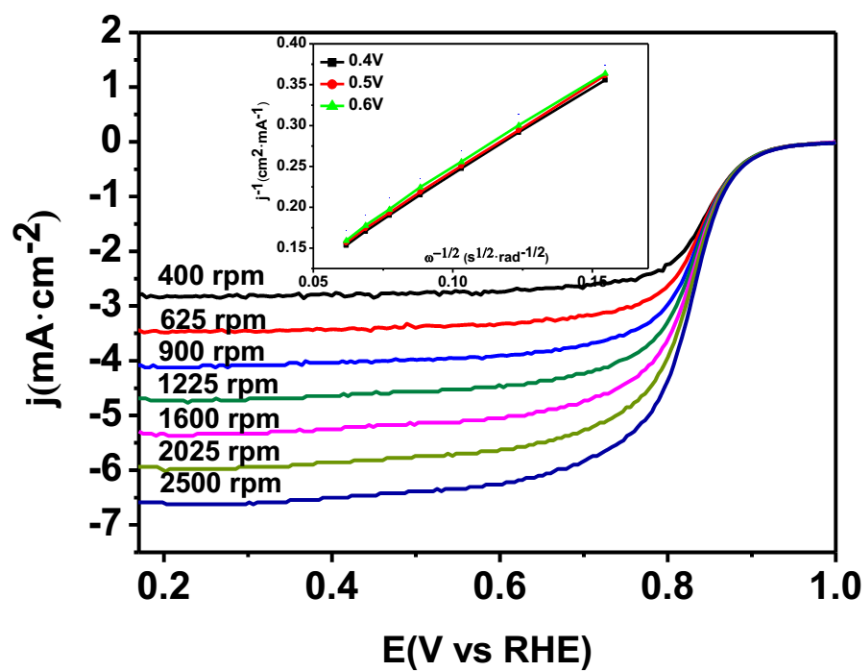

**Figure S9.** ORR LSV curves of commercial Pt/C at various rotation rates from 400 to 2500 rpm

**Table S1.** Elemental and species composition of FeNS/HPC

| C <sup>a</sup> (%) | O <sup>a</sup> (%) | Si <sup>a</sup> (%) | Fe <sup>a</sup> (%) | N <sup>a</sup> (%)  |                     |                     | S <sup>a</sup> (%)     |                     |
|--------------------|--------------------|---------------------|---------------------|---------------------|---------------------|---------------------|------------------------|---------------------|
| 76.92              | 12.04              | 1.52                | 0.64                | 7.21                |                     |                     | 1.67                   |                     |
|                    |                    |                     |                     | N1 <sup>b</sup> (%) | N2 <sup>b</sup> (%) | N3 <sup>b</sup> (%) | S1&S2 <sup>c</sup> (%) | S3 <sup>c</sup> (%) |
|                    |                    |                     |                     | 21                  | 9                   | 70                  | 68                     | 32                  |

<sup>a</sup> These values refer to the atomic ratio obtained from XPS analysis. <sup>b</sup> These values were calculated based on their relative area of XPS peaks in terms of nitrogen species. <sup>c</sup> These values were calculated based on their relative area of XPS peaks in terms of sulfur species.

**Table S2.** Atomic percentage of different elements in the samples FeNS/HPC prepared at 700, 800, 900 and 1000 °C

| T(°C) | C(%)  | O(%)  | N(%)  | S(%) | Fe(%) | Si(%) |
|-------|-------|-------|-------|------|-------|-------|
| 700   | 62.80 | 12.03 | 17.44 | 1.59 | 0.38  | 5.76  |
| 800   | 65.69 | 12.92 | 14.45 | 0.96 | 0.31  | 5.66  |
| 900   | 76.92 | 12.04 | 7.21  | 1.67 | 0.64  | 1.52  |
| 1000  | 76.48 | 20    | 1.66  | -*   | -*    | 1.86  |

\* It represent that no sulfur or iron element is detected in corresponding catalyst

**Table S3.** Relative atomic percentage of nitrogen species on different FeNS/HPC<sub>x00</sub> materials

| Materials                   | N-content (%) | Pyridinic-N (%) | Pyrrolic-N (%) | Graphitic-N (%) |
|-----------------------------|---------------|-----------------|----------------|-----------------|
| N/S/Fe-HPC <sub>-700</sub>  | 17.44         | 10.12           | 2.96           | 4.36            |
| N/S/Fe-HPC <sub>-800</sub>  | 14.45         | 6.79            | 2.02           | 5.63            |
| N/S/Fe-HPC <sub>-900</sub>  | 7.21          | 1.51            | 0.65           | 5.05            |
| N/S/Fe-HPC <sub>-1000</sub> | 1.66          | 0.33            | 0.12           | 1.21            |

## REFERENCES

1. Allen J. Bard and Larry R. Faulkner, *Electrochemical Methods: Fundamentals and Applications*, New York: Wiley, **2001**.
2. Liang, Y.; Li, Y.; Wang, H.; Zhou, J.; Wang, J.; Regier, T.; Dai, H., Co<sub>3</sub>O<sub>4</sub> nanocrystals on graphene as a synergistic catalyst for oxygen reduction reaction. *Nat. Mater.***2011**, 10 (10), 780-786.
3. Paulus, U. A.; Schmidt, T. J.; Gasteiger, H. A.; Behm, R. J., Oxygen reduction on a high-surface area Pt/Vulcan carbon catalyst: a thin-film rotating ring-disk electrode study. *J. Electroanal. Chem.* **2001**, 495 (2), 134-145.
